# Supplementary material for: Potential Networks of Nitrogen-Phosphorus-Potassium Channels and Transporters in Arabidopsis Roots at a Single Cell Resolution
Source: Frontiers journal article supplement (doi:10.3389/fpls.2021.689545), 2021-06-16
Supplement: Data_Sheet_1.PDF [file Data_Sheet_1.PDF]

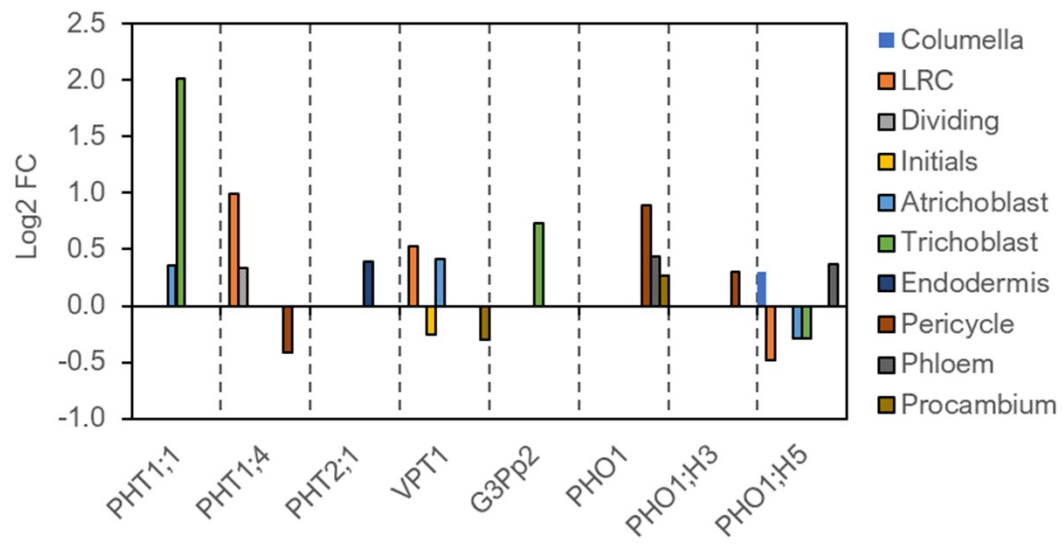

**Figure S1** | Differentially expressed Pi transporters in specific root cell types under Pi starvation. The data were retrieved from Wendrich et al., 2020.
